# Supplementary material for: Augmenting Computerized Cognitive Training With Vortioxetine for Age-Related Cognitive Decline: A Randomized Controlled Trial
Source: Atypon-hosted journal article supplement (doi:10.1176/appi.ajp.2019.19050561), 2020-03-26

**FIGURE S1. Changes in cognitive function, as measured by the NIH Toolbox Cognition Battery, in the 2 groups**

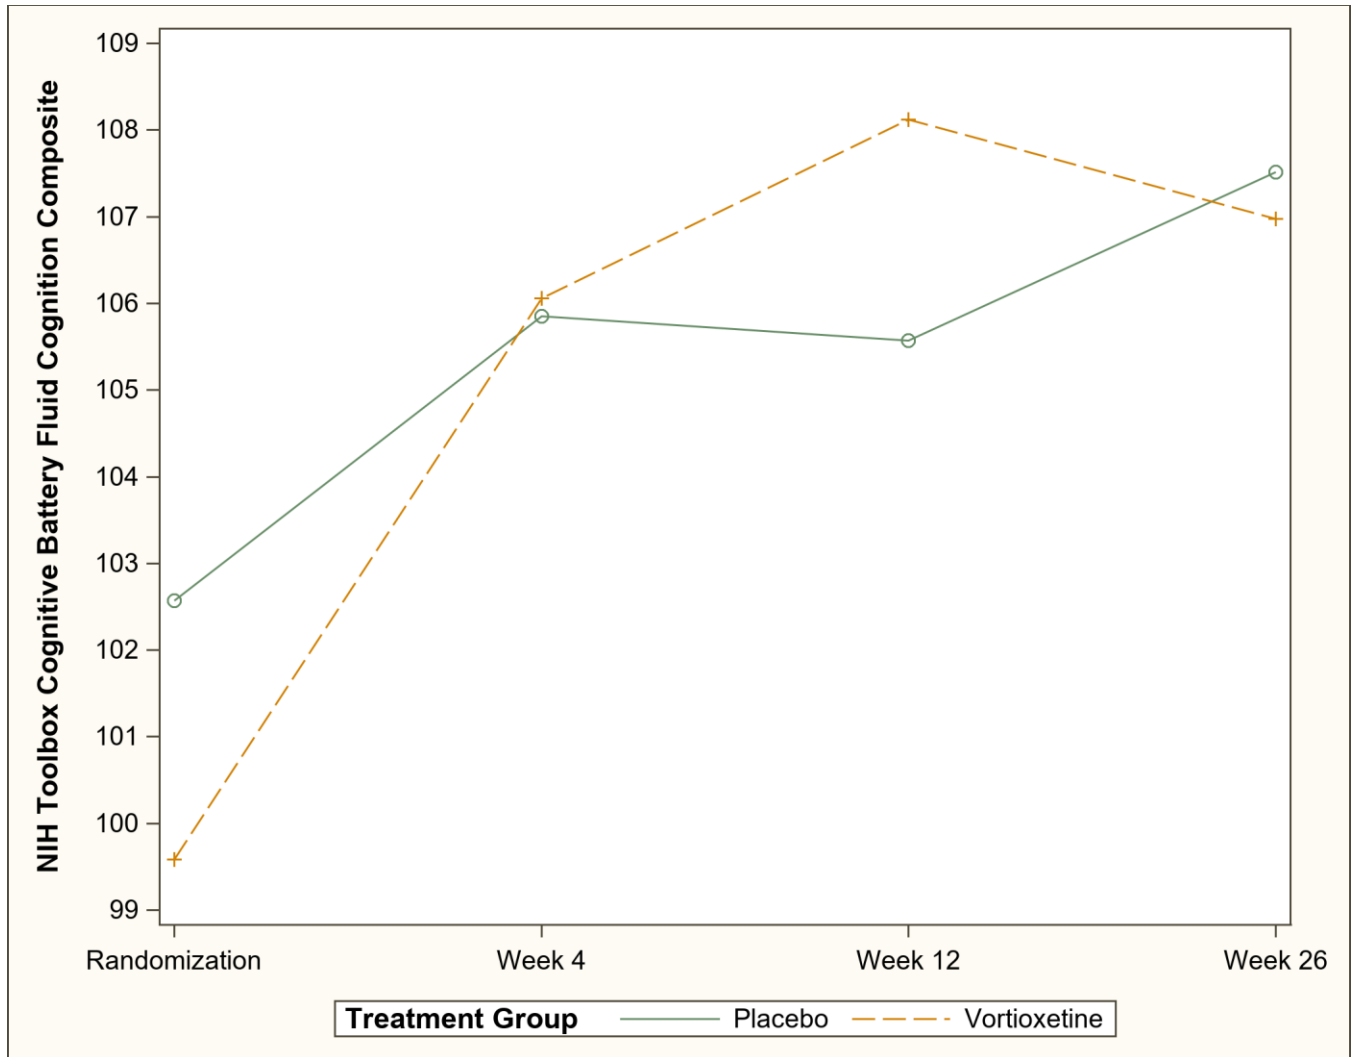

**TABLE S1. Components of NIH Toolbox Fluid Cognition Composite.** The table shows the difference in the mean change from baseline between vortioxetine and placebo groups. A positive estimate: greater increase in vortioxetine compared to placebo group.

| <i>Change from baseline</i>              | <b>Estimate</b> | <b>SE</b> | <b>t</b> | <b>p</b> |
|------------------------------------------|-----------------|-----------|----------|----------|
| Dimensional Change Card Sort             |                 |           |          |          |
| to Week 4                                | 2.04            | 2.06      | 0.99     | 0.32     |
| to Week 12                               | 4.40            | 2.10      | 2.09     | 0.037    |
| to Week 26                               | 2.84            | 2.17      | 1.31     | 0.19     |
| Flanker Inhibitory Control and Attention |                 |           |          |          |
| to Week 4                                | 0.89            | 1.36      | 0.66     | 0.51     |
| to Week 12                               | -0.60           | 1.39      | -0.43    | 0.67     |
| to Week 26                               | -0.55           | 1.43      | -0.39    | 0.70     |
| List Sorting Working Memory              |                 |           |          |          |
| to Week 4                                | 1.28            | 2.52      | 0.51     | 0.61     |
| to Week 12                               | 3.64            | 2.56      | 1.42     | 0.16     |
| to Week 26                               | -0.38           | 2.64      | -0.14    | 0.89     |
| Picture Sequence Memory                  |                 |           |          |          |
| to Week 4                                | 2.17            | 2.89      | 0.75     | 0.45     |
| to Week 12                               | 4.29            | 2.95      | 1.46     | 0.15     |
| to Week 26                               | -0.77           | 3.04      | -0.25    | 0.80     |
| Pattern Comparison Processing Speed      |                 |           |          |          |
| to Week 4                                | 2.26            | 2.46      | 0.92     | 0.36     |
| to Week 12                               | 2.86            | 2.51      | 1.14     | 0.25     |
| to Week 26                               | 4.16            | 2.58      | 1.61     | 0.11     |

**FIGURE S2. Adherence to the cognitive training per week in the 26 randomized study, by group (vortioxetine vs. placebo).** The figure displays the distribution of participants with high adherence (green bar;  $\geq 100\%$  goal in terms of minutes cognitive training/week), medium adherence (red bar; 80-100%), and low adherence (blue bar;  $<80\%$ ). Adherence remained high in both groups over the 26 weeks.

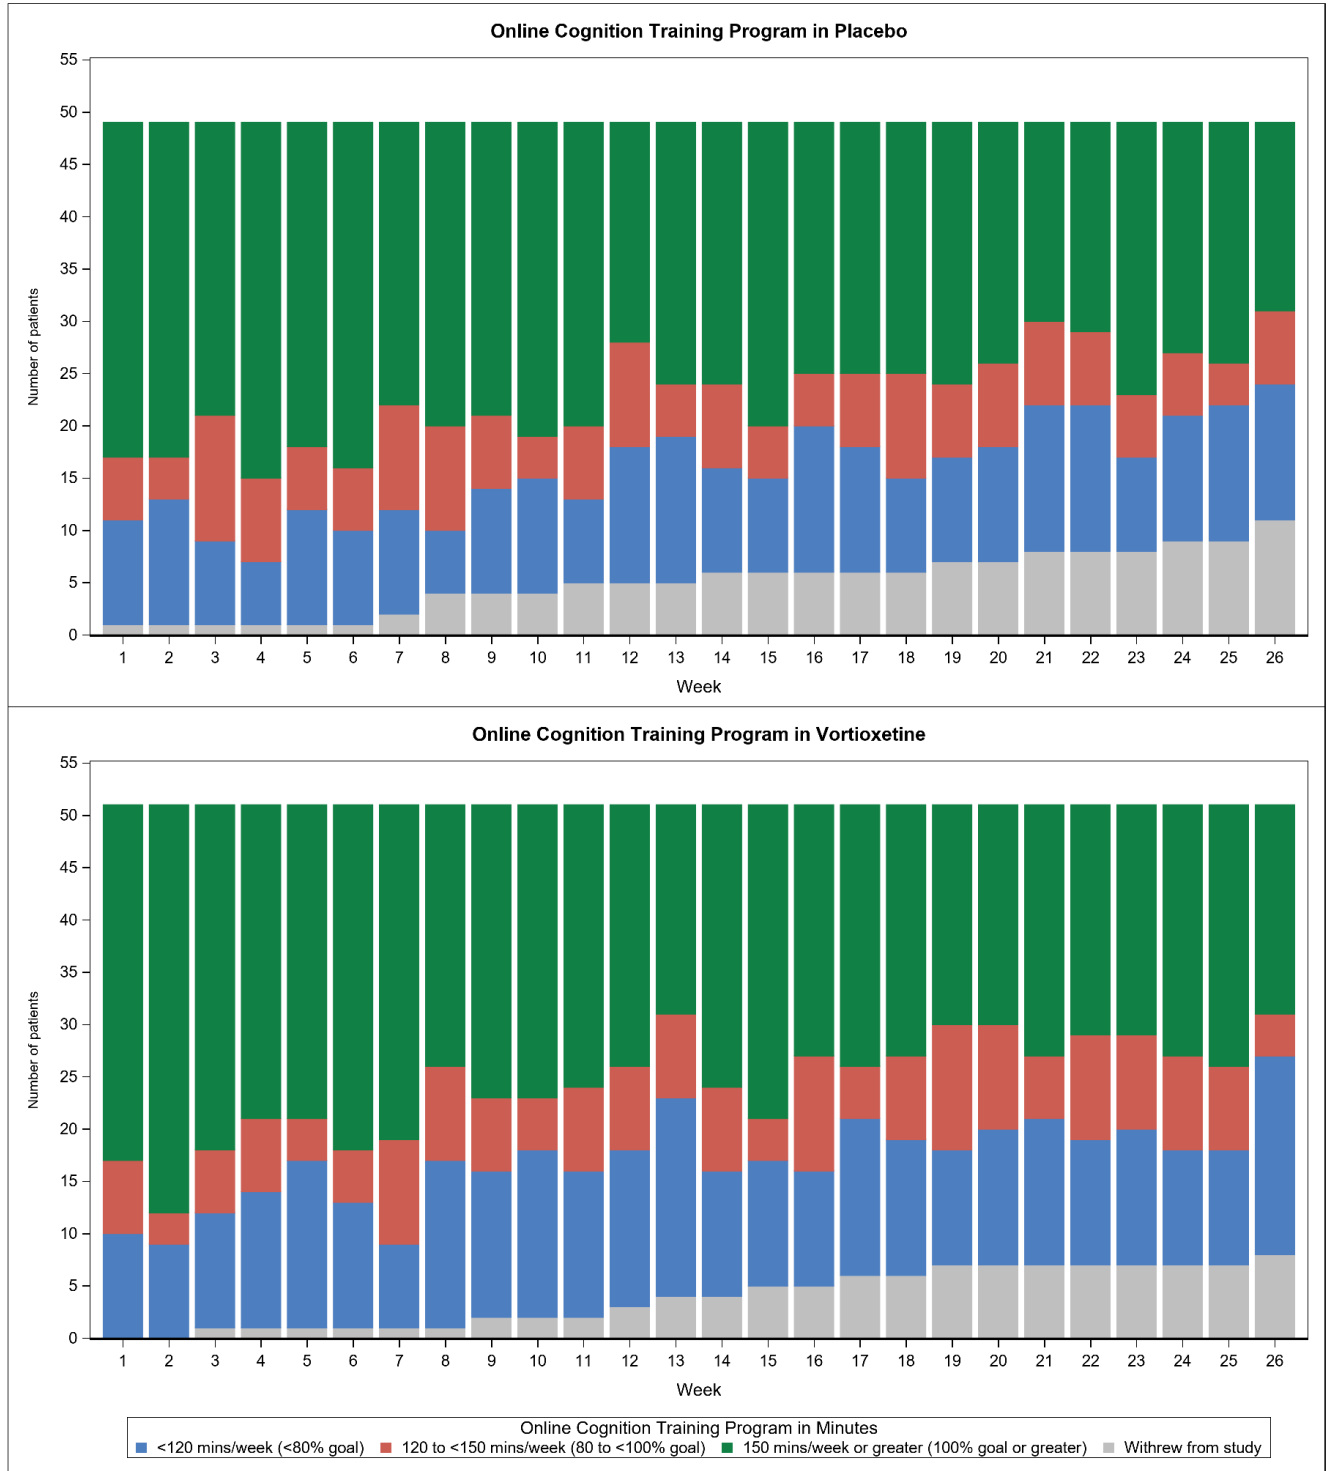

Supplement: appi.ajp.2019.19050561.ds001.pdf [file appi.ajp.2019.19050561.ds001.pdf]
